# Supplementary material for: Targeting Artemis Sensitizes B Cells to Topoisomerase 2 Poisons by Disrupting DNA-PKcs-Dependent Repair
Source: Research Square preprint supplement (doi:10.21203/rs.3.rs-6317145/v1), 2025-06-19
Supplement: Supplementary file 1 [file 4eadba1b746f9853fdf6542d.pdf]

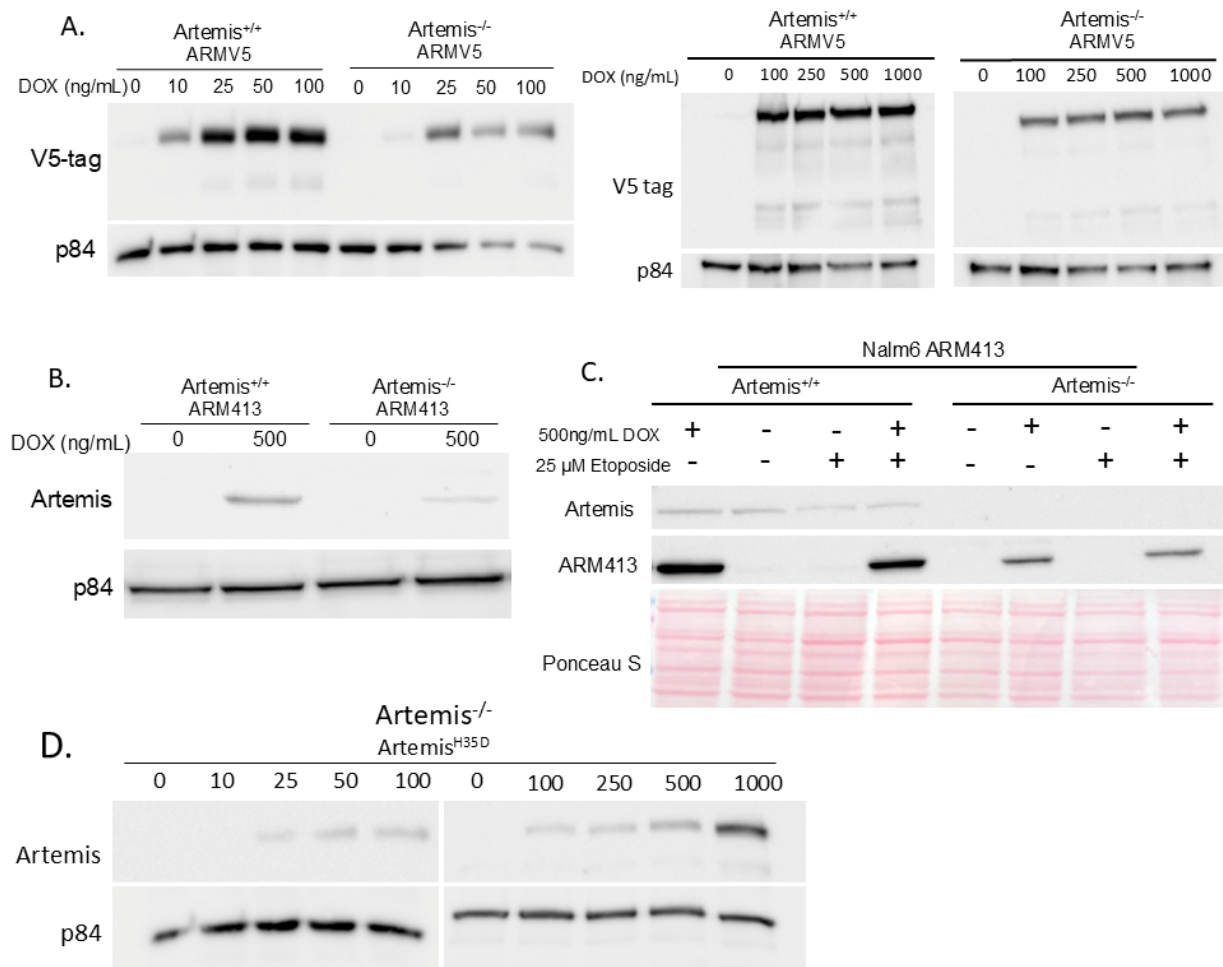

**Supplemental Figure 1. Expression of Artemis variants in Nalm6 human pre-B cells.**

(A) Western blot with Artemis<sup>+/+</sup> and Artemis<sup>-/-</sup> Nalm6 transduced to express ARMV5 with a Dox-inducible promoter treated with indicated concentrations of Dox overnight.

(B) As in (A) but transduced with the ARM413 cassette.

(C) As in (B), but comparing cells treated with or without etoposide for 1 hour and depicting endogenous Artemis as well as expressed ARM413.

(D) As in (A) but transduced with the Artemis<sup>H35D</sup> cassette in Artemis<sup>-/-</sup> only.

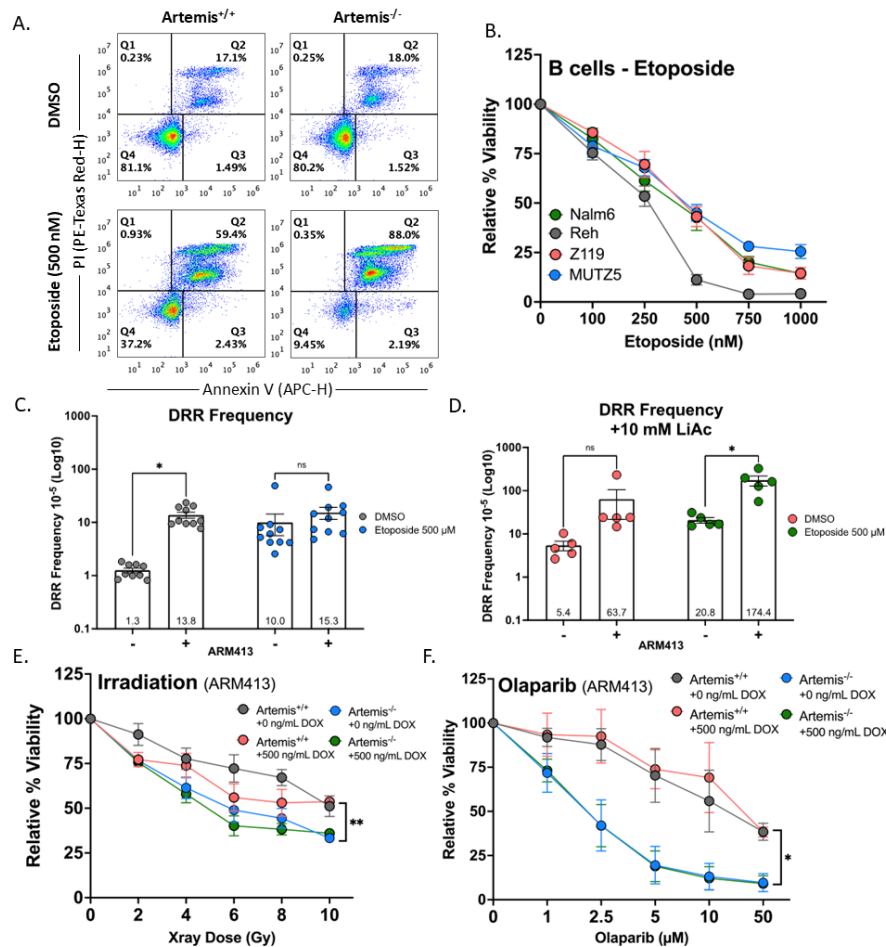

**Supplemental Figure 2. Effect of Top2 poisons with or without ARM413.**

(A) Density plots of Artemis<sup>+/+</sup> and Artemis<sup>-/-</sup> treated with DMSO or Etoposide (500 nM) for 24h from flow cytometry acquisition. Cells are gated on APC-H (for Annexin V positive cells) and PE-Texas Red (for PI positive cells) in quadrants. Viable cell percentage is indicated as the double negative population in Q4.

(B) Line graph comparing viability of Nalm6, Reh, Z119, and MUTZ5 cells measured using CellTiter Glo after increasing doses of Etoposide over 48h.

(C) Bar plots showing change in recombination frequency representing DSB frequency in yeast after treatment with etoposide and expression of ARM413 (2way ANOVA; \* p-value = 0.0168, ns=not significant).

(D) As in (C), but with the addition of lithium acetate for increased permeability of etoposide (\* p-value = 0.0172).

(E) Line graph comparing viability of Nalm6 ARM413 cells measured using CellTiter Glo after exposure to increasing doses of radiation and recovery for 24h. Values are normalized to non-irradiated values (paired t-test; \*\* p-value = 0.0061).

(F) As in (A) but treated with increasing doses of Olaparib over 72H (paired t-test; \* p-value = 0.0102)

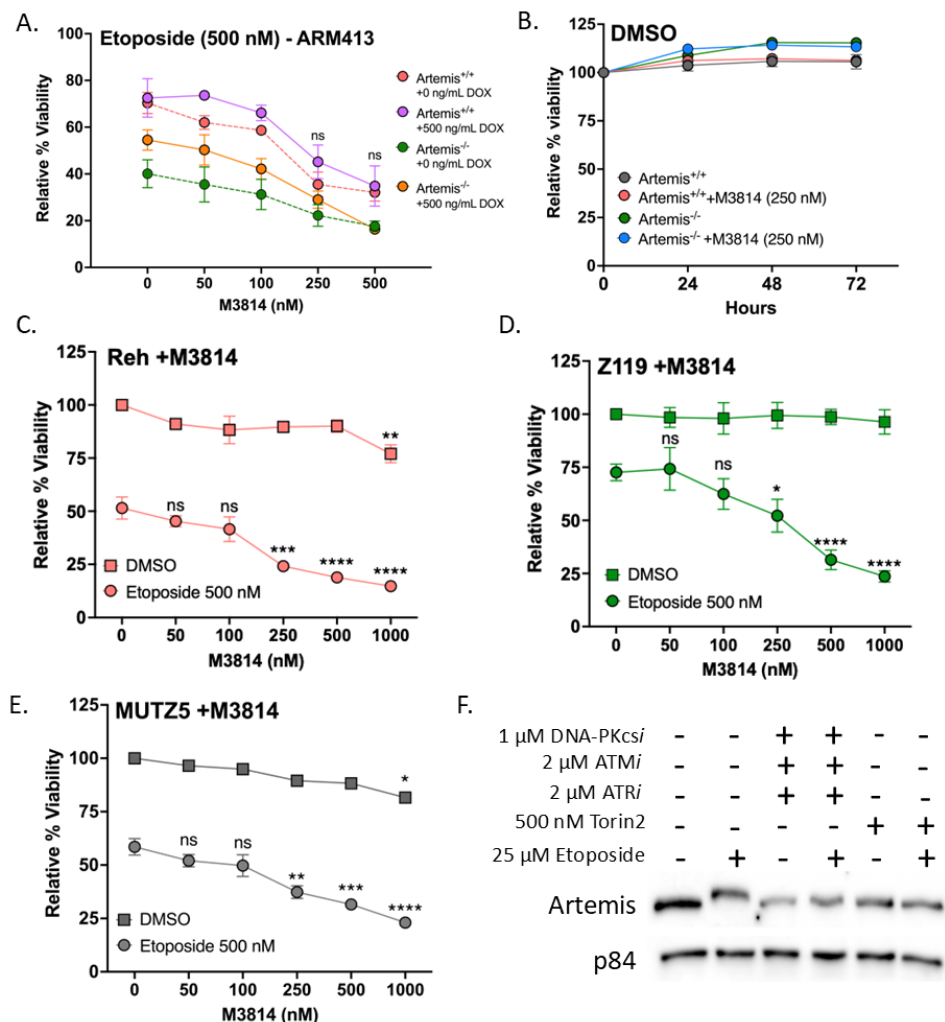

**Supplemental Figure 3. M3814 does not affect viability alone while PIKK inhibition blocks Artemis phosphorylation.**

(A) Line graph comparing viability measured using CellTiter Glo after overnight Dox treatment to express ARM413. Values are normalized to DMSO. Dashed lines indicate data presented in Figure 2A for direct comparison (2way ANOVA; ns=not significant).

(B) Line graph of a time course showing decreased viability over indicated time points after DMSO treatment with or without M3814.

(C) Line graph comparing viability of Reh with M3814 treatment measured using CellTiter Glo with or without etoposide. Values are normalized to 0 nM M3814 (2way ANOVA; \*\*= $p$  value  $\leq 0.01$ , \*\*\*= $p$  value  $\leq 0.0005$ , \*\*\*\*= $p$  value  $\leq 0.0001$ ).

(D) As in (C) but with Z119 (2way ANOVA; \*= $p$  value  $\leq 0.05$ )

(E) As in (D) but with MUTZ5.

(F) Western blot depicting Artemis phosphorylation after 3h treatment with described inhibitors and 1h treatment with etoposide. p84 is used as a loading control.

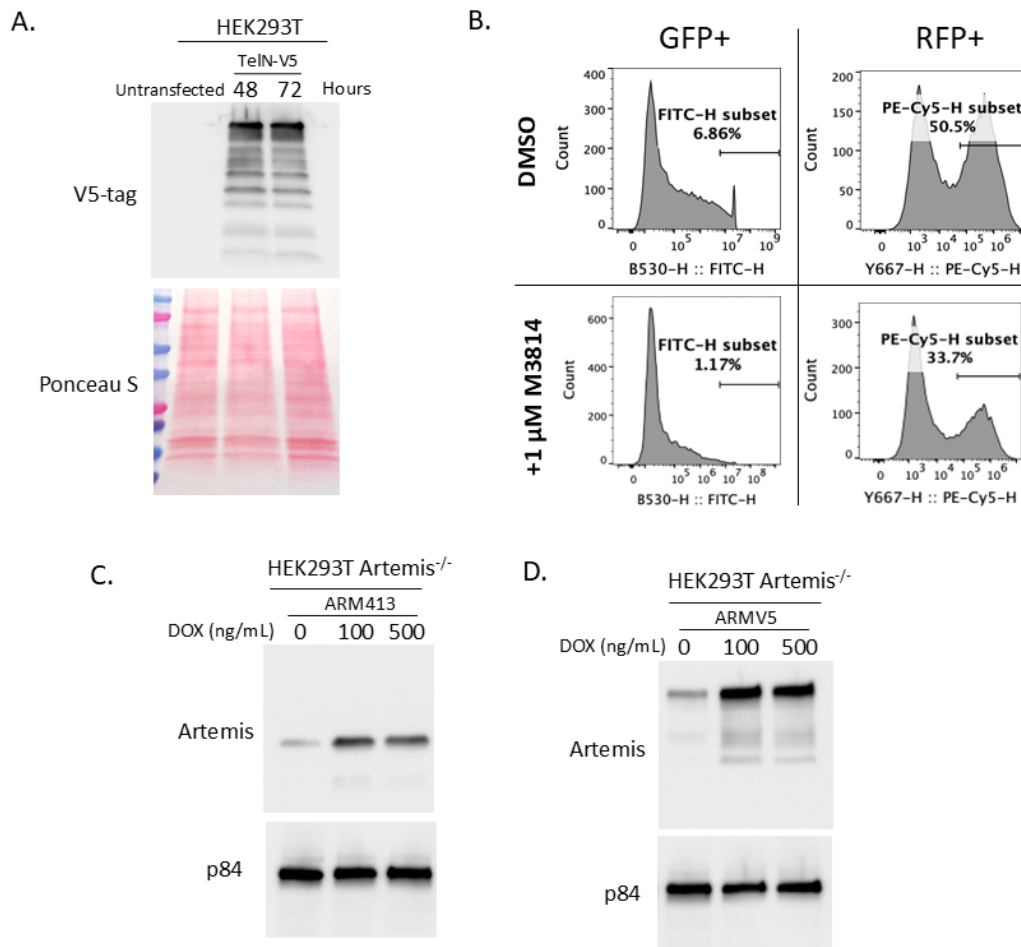

**Supplemental Figure 4. Expression of Artemis variants in HEK293T and Top2 accumulation in Nalm6 Artemis<sup>-/-</sup> cells treated with mitoxantrone.**

(A) Western blot showing TelN-V5 expression 48h and 72h post-transfection in HEK293T. Ponceau S is shown as a loading control.

(B) Histograms representing gating strategy in FlowJo for HEK293T cells after treatment with DMSO or 1  $\mu$ M M3814.

(C) Western blots depicting Artemis variant expression 8h post-transfection of plasmids into HEK293T Artemis<sup>-/-</sup>. p84 is used as a loading control.

(D) As in (C), with ARMV5.

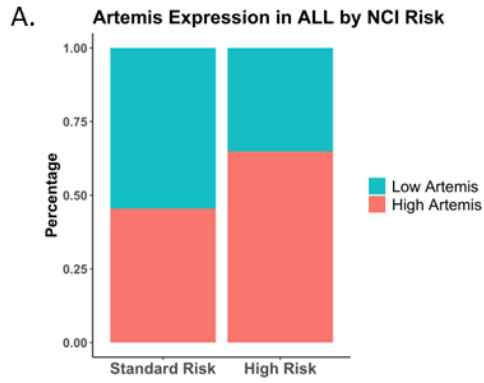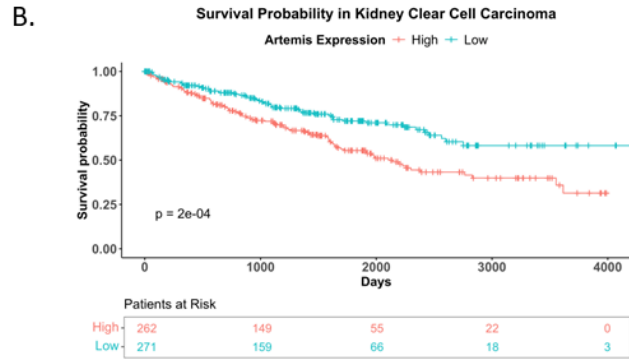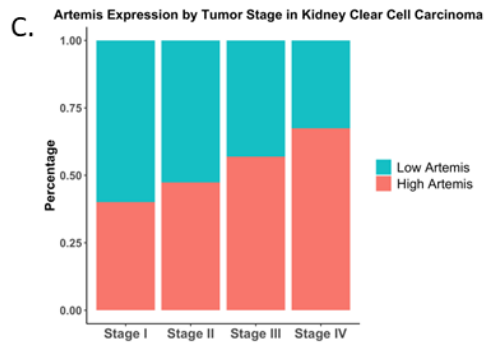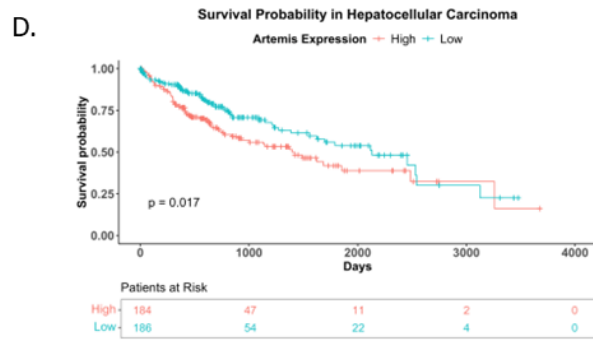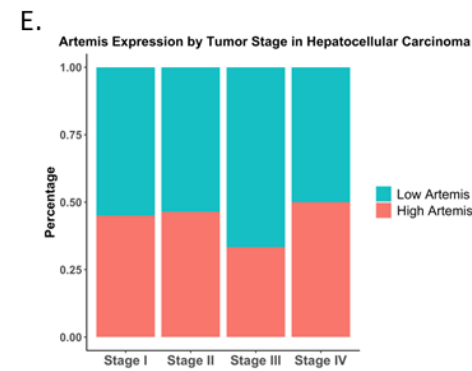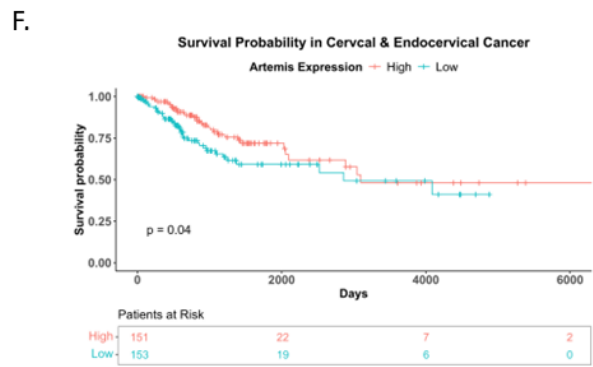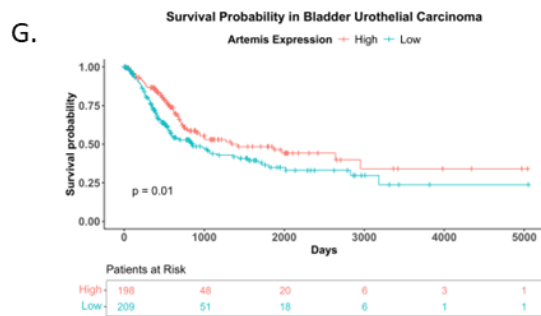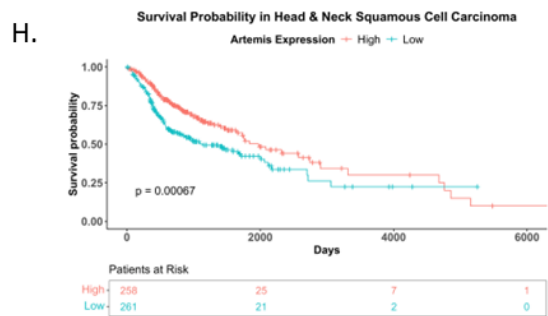

**Supplemental Figure 5. High Artemis expression has variable correlation with cancer prognosis in several cancer types.**

(A) Bar Chart comparing the percentage of patients within each NCI Risk group with high/low Artemis expression using the DFCI ALL database (n=10-24 patients per risk group).

(B) Kaplan-Meier survival curve of Kidney Clear Cell Carcinoma patients based on high/low Artemis expression using TCGA (n=533).

(C) Bar Chart comparing the percentage of patients with high/low Artemis expression within each kidney clear cell carcinoma tumor stage using TCGA (n=27-160 patients per stage).

(D) Kaplan-Meier survival curve of Hepatocellular Carcinoma patients based on high/low Artemis expression using TCGA (n=370).

(E) Bar Chart comparing the percentage of patients with high/low Artemis expression within each hepatocellular carcinoma tumor stage using TCGA (n=1-94 patients per stage).

(F) Kaplan-Meier survival curve of Cervical & Endocervical Cancer patients based on high/low Artemis expression using TCGA (n=304).

(G) Kaplan-Meier survival curve of Bladder Urothelial Carcinoma patients based on high/low Artemis expression using TCGA (n=407).

(H) Kaplan-Meier survival curve of Head & Neck Squamous Cell Carcinoma patients based on high/low Artemis expression using TCGA (n=519).

**Table S1. Resources and Materials Used in this Work**

| REAGENT or RESOURCE                                  | SOURCE                      | IDENTIFIER                      |
|------------------------------------------------------|-----------------------------|---------------------------------|
| <b>Antibodies</b>                                    |                             |                                 |
| Anti-Top2A (D10G9) XP®; rabbit monoclonal            | Cell Signaling Technologies | Cat# 12286;<br>RRID:AB_2797871  |
| Anti-Artemis (D708V); rabbit monoclonal              | Cell Signaling Technologies | Cat# 13381;<br>RRID:AB_2798197  |
| Anti-p84; mouse monoclonal                           | GeneTex                     | Cat# GTX70220<br>RRID:AB_372637 |
| Anti-V5-tag (D3H8Q); rabbit monoclonal               | Cell Signaling Technologies | Cat# 13202;<br>RRID:AB_2687461  |
| Anti-mouse IgG (H+L); secondary HRP-linked           | Thermo Fisher Scientific    | Cat# 31430; RRID:AB_228307      |
| Anti-rabbit IgG; secondary HRP-linked                | Millipore                   | Cat# 12-348;<br>RRID:AB_390191  |
| Anti-phospho-CHK1 (Ser 345); rabbit monoclonal       | Cell Signaling              | Cat# 2348T; RRID:AB_331212      |
| Anti-CHK1 (G-4); mouse monoclonal                    | Santa Cruz Biotechnology    | Cat# sc-8408;<br>RRID:AB_627257 |
| <b>Chemicals, peptides, and recombinant proteins</b> |                             |                                 |
| Immobilon Western Chemiluminescent HRP Substrate     | Millipore                   | Cat# WBKLS0050                  |
| Glutamax                                             | Gibco                       | Cat# 35050-061                  |
| RPMI 1640 Medium, no glutamine                       | Thermo Fisher Scientific    | Cat# 21870092                   |
| Corning® 96-well White/Clear Flat Bottom Microplate  | Corning                     | Cat# 3632                       |
| G418                                                 | Gold Biotechnology          | Cat# G-418-10                   |
| Ciprofloxacin Hydrochloride                          | Fisher Scientific           | Cat# NC1265500                  |
| DMEM/High glucose, L-glutamine, sodium pyruvate      | Fisher Scientific           | Cat# SH30243.FS                 |
| TRIzol                                               | Thermo Fisher Scientific    | Cat# 15596018                   |
| DNAzol Reagent                                       | Thermo Fisher Scientific    | Cat# 10503027                   |
|                                                      |                             |                                 |
| <b>Critical commercial assays</b>                    |                             |                                 |
| Pierce™ BCA Protein Assay Kit                        | Thermo Fisher Scientific    | Cat# 23227                      |
| CellTiter Glo 2.0                                    | Promega                     | Cat# G9242                      |
| NanoDrop One Spectrophotometer                       | Thermo Fisher Scientific    | Cat# ND-ONE-W                   |
| Maxima H Minus cDNA Synthesis Master Mix             | Thermo Fisher Scientific    | Cat# M1661                      |
| SYBR Green Master Mix                                | Applied Biosystems          | Cat# 100029283                  |

|                                                      |                                     |                                                                                                                                                           |
|------------------------------------------------------|-------------------------------------|-----------------------------------------------------------------------------------------------------------------------------------------------------------|
|                                                      |                                     |                                                                                                                                                           |
| <b>Deposited Data</b>                                |                                     |                                                                                                                                                           |
| GEO (GSE 181157)                                     | Tran et. al., 2022                  |                                                                                                                                                           |
|                                                      |                                     |                                                                                                                                                           |
| <b>Experimental models: Cell lines</b>               |                                     |                                                                                                                                                           |
| Nalm6                                                | ATCC                                | CRL-3273                                                                                                                                                  |
| Nalm6 Artemis <sup>-/-</sup>                         | Kurosawa, et. al., 2008             |                                                                                                                                                           |
| Reh                                                  | ATCC                                | CRL-8286                                                                                                                                                  |
| Z119                                                 | ATCC                                | CRL-3394                                                                                                                                                  |
| MUTZ5                                                | DSMZ                                | ACC-490                                                                                                                                                   |
| U2OS                                                 | ATCC                                | HTB-96                                                                                                                                                    |
| HEK293T                                              | ATCC                                | CRL-3216                                                                                                                                                  |
| HEK293T Artemis <sup>-/-</sup>                       | Meek, 2020 <sup>43</sup>            | N/A                                                                                                                                                       |
| Nalm6 Artemis <sup>+/+</sup> ARM413                  | This Study                          | N/A                                                                                                                                                       |
| Nalm6 Artemis <sup>-/-</sup> ARM413                  | This Study                          | N/A                                                                                                                                                       |
| Nalm6 Artemis <sup>+/+</sup> ARMV5                   | This Study                          | N/A                                                                                                                                                       |
| Nalm6 Artemis <sup>-/-</sup> ARMV5                   | This Study                          | N/A                                                                                                                                                       |
| Nalm6 Artemis <sup>-/-</sup> ARMV5                   | This Study                          | N/A                                                                                                                                                       |
| Nalm6 Artemis <sup>-/-</sup> Artemis <sup>H35D</sup> | This Study                          | N/A                                                                                                                                                       |
| <b>Recombinant DNA</b>                               |                                     |                                                                                                                                                           |
| TelN-V5                                              | Meek, 2020                          | N/A                                                                                                                                                       |
| TelN/Crim                                            | Meek, 2020                          |                                                                                                                                                           |
| pINDUCER20-ARMV5                                     | This Study                          | N/A                                                                                                                                                       |
| pINDUCER20-ARM413                                    | This Study                          | N/A                                                                                                                                                       |
| pINDUCER20-Artemis <sup>H35D</sup>                   | This Study                          | N/A                                                                                                                                                       |
|                                                      |                                     |                                                                                                                                                           |
| <b>Oligonucleotides</b>                              |                                     |                                                                                                                                                           |
| <u>RT-qPCR Primers</u>                               |                                     |                                                                                                                                                           |
| DCLRE1C Forward<br>5'-GAGCTAGAACAGTTCACCGAGAC-3'     | Integrated DNA Technologies,<br>Inc |                                                                                                                                                           |
| DCLRE1C Reverse<br>5'-CAGGCTGCTTTTCTGATACTGCA -3'    | Integrated DNA Technologies,<br>Inc |                                                                                                                                                           |
|                                                      |                                     |                                                                                                                                                           |
| <b>Software and algorithms</b>                       |                                     |                                                                                                                                                           |
| Image Lab, version 6.1.0 build 7                     | Bio-Rad Laboratories                | <a href="https://www.bio-rad.com/en-us/product/image-lab-software?ID=KRE6P5E8Z">https://www.bio-rad.com/en-us/product/image-lab-software?ID=KRE6P5E8Z</a> |
| R (version 4.4.0)                                    | R Core Team                         | <a href="https://www.R-project.org/">https://www.R-project.org/</a>                                                                                       |
| ggplot2 (version 3.5.1)                              | Wickham et. al., 2024 <sup>66</sup> | <a href="https://cran.r-project.org/package=ggplot2">https://cran.r-project.org/package=ggplot2</a>                                                       |



|                           |                                       |                                                                                                         |
|---------------------------|---------------------------------------|---------------------------------------------------------------------------------------------------------|
| survival (version 3.5-7)  | Therneau et. al., 2024 <sup>67</sup>  | <a href="https://CRAN.R-project.org/package=survival">https://CRAN.R-project.org/package=survival</a>   |
| survminer (version 0.4.9) | Kassambra et. al., 2024 <sup>68</sup> | <a href="https://cran.r-project.org/package=survminer">https://cran.r-project.org/package=survminer</a> |
